# Supplementary material
Source: PubMed Central journal article supplement (PMC7891213)
Supplement: Supp_FigS1.pdf [file Supp_FigS1.pdf]

## Supplementary Data

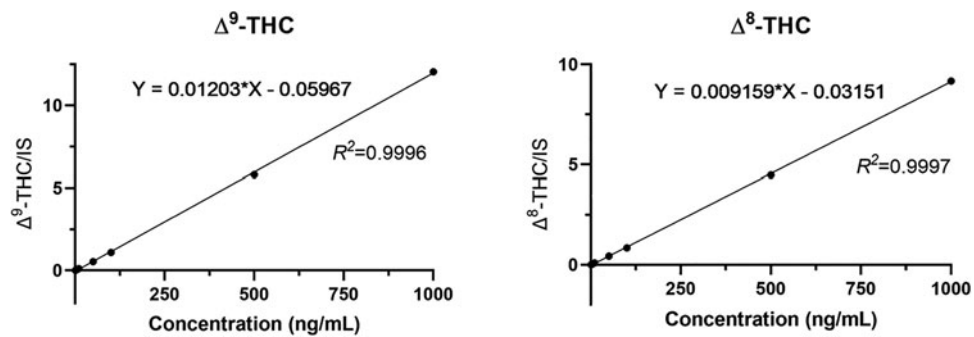

**SUPPLEMENTARY FIG. S1.** Calibration curves of  $\Delta^9$ -THC and  $\Delta^8$ -THC.  $\Delta^9$ -THC/IS and  $\Delta^8$ -THC/IS ratios plotted against nominal concentration of the calibration standards. Linear equation and  $R^2$  are reported for each plot. IS, internal standard; THC, tetrahydrocannabinol.
