# Supplementary material
Source: PubMed Central journal article supplement (PMC7891213)
Supplement: Supp_FigS2.pdf [file Supp_FigS2.pdf]

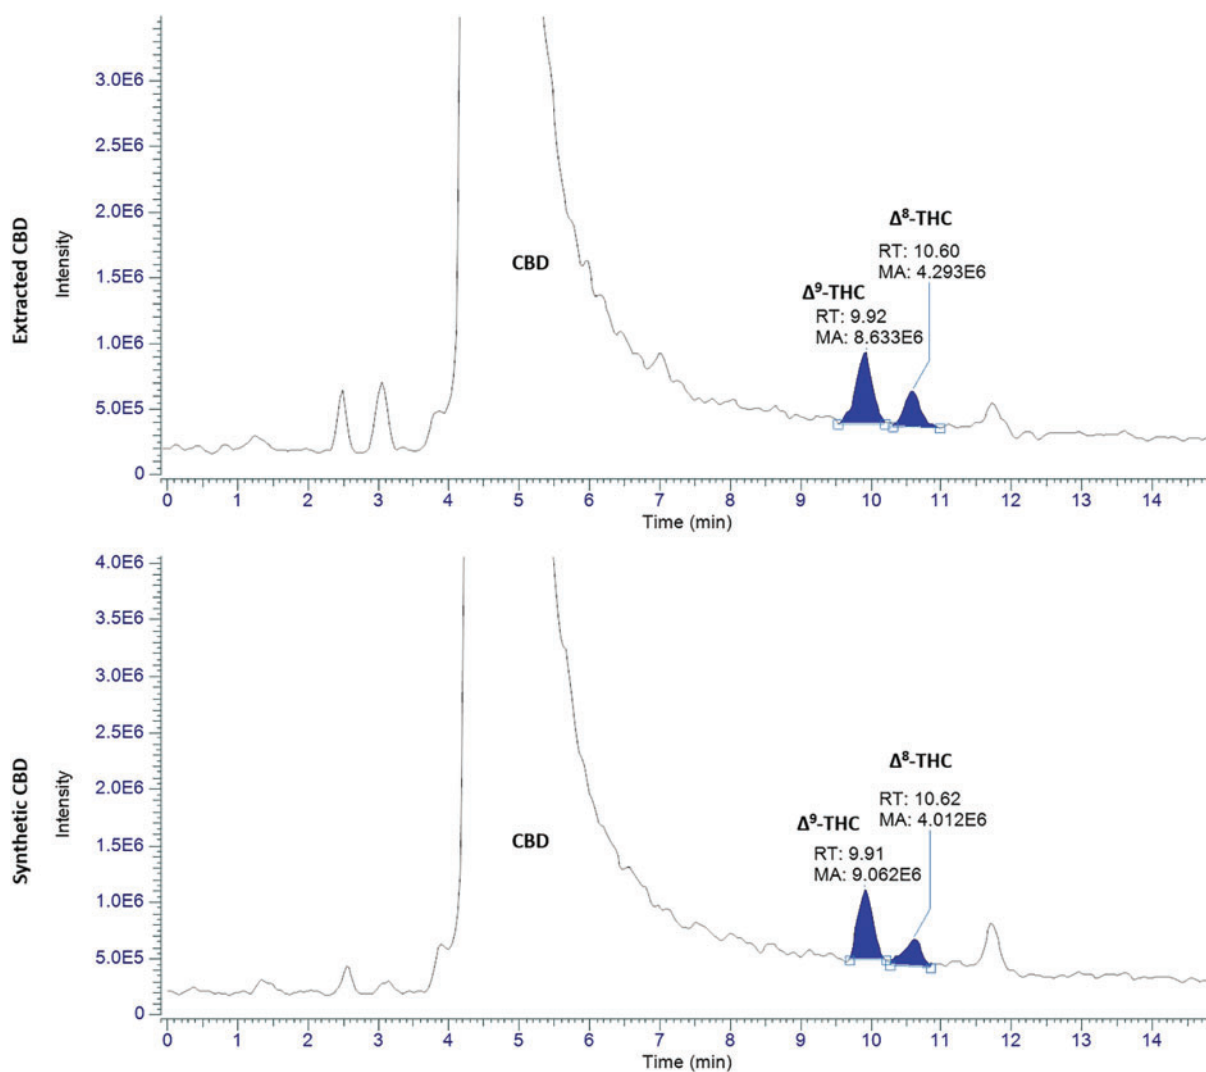

**SUPPLEMENTARY FIG. S2.** Purity assessment of CBD samples. UHPLC-HRMS chromatograms of extracted (top) and synthetic (bottom) CBD spiked with  $\Delta^9$ -THC and  $\Delta^8$ -THC at their LOQ (5 ng/mL). The traces were generated by extracting the mass range in HESI+ mode at  $m/z$  315.2319 ( $\Delta$ ppm = 5). CBD, cannabidiol; UHPLC-HRMS, ultrahigh-performance liquid chromatography-based method coupled to high-resolution Orbitrap mass spectrometry detection.
